# Supplementary material
Source: publisher figshare collection journal article supplement (https://adisjournals.figshare.com/articles/dataset/_/11671980)
Supplement: Supplementary file 1 [file 2]

# Infecciones ORL pediátricas recurrentes y sus complicaciones: ¿podemos hacer más?

Ricardo Marengo - José A. Ortega Martell - Susanna Esposito

Recibido: 12 de noviembre de 2019 / Publicado en internet: 24 de abril de 2020  
© Los autores 2020

## RESUMEN

Las infecciones recurrentes del tracto respiratorio (IrTR) se pueden dividir en tres grupos principales: otitis media, amigdalitis y sinusitis. Son muy frecuentes en poblaciones pediátricas y se asocian a una importante morbilidad debido a sus complicaciones. Estas infecciones reducen sustancialmente la calidad de vida de los pacientes pediátricos y sus familias, y suponen una considerable carga personal, médica y económica para los pacientes, sus familiares y

el sistema sanitario. La mayoría de las IrTR son de origen vírico, pero el uso indiscriminado de antibióticos para su tratamiento ha dado lugar al desarrollo de resistencias bacterianas. El manejo efectivo de las IrTR para reducir la carga de la enfermedad y evitar un uso excesivo de los antibióticos se ha convertido en un gran desafío terapéutico. Entre las nuevas estrategias para el manejo de las IrTR pediátricas se incluye el abordaje preventivo con inmunomoduladores inespecíficos para reforzar las defensas naturales del organismo frente a la infección, además

---

**Materiales digitales de mayor calidad** Si desea ver materiales digitales de mayor calidad para este artículo, consulte <https://doi.org/10.6084/m9.figshare.11671980>.

---

R. Marengo  
ENT and Audiology Department of CEMIC Surgery  
Department, University Institute CEMIC, Valdenegro,  
Buenos Aires, Argentina

J. A. Ortega Martell (✉)  
Department of Immunology, Universidad Autónoma  
del Estado de Hidalgo, Pachuca, Hidalgo, México  
Correo electrónico: [drortegamartell@prodigy.net.mx](mailto:drortegamartell@prodigy.net.mx)

J. A. Ortega Martell  
Consejo Nacional de Inmunología Clínica y Alergia,  
Mexico city, México

J. A. Ortega Martell  
Organization Mundial de Alergia (World Allergy  
Organization), Milwaukee, WI, Estados Unidos

J. A. Ortega Martell  
Colegio Mexicano de Inmunología Clínica y Alergia  
(CMICA), Mexico city, México

J. A. Ortega Martell  
Colegio Mexicano de Pediatras Especialistas en  
Inmunología Clínica y Alergia (COMPEDIA), Colonia  
Napoles, México

S. Esposito  
Pietro Barilla Children's Hospital, Milán, Italia

S. Esposito  
Department of Medicine and Surgery, University  
of Parma, Parma, Italia

S. Esposito  
World Association for Infectious Diseases and  
Immunological Disorders (WAidid), Milán, Italia

de reducir la inflamación de las vías aéreas inducida por la infección y los alérgenos. El inmunomodulador oral OM-85 es un lisado bacteriano que actúa sobre las vías innata y adquirida del sistema inmunitario, de modo que confiere protección frente a las infecciones víricas y bacterianas y también controla la inflamación, reduciendo así el daño tisular. OM-85 ha demostrado buena tolerabilidad y eficacia clínica para reducir el número y la duración de las ITR en niños con infecciones recurrentes de las vías aéreas. También se ha publicado que reduce el uso de medicación concomitante (incluidos los antibióticos), el tiempo hasta la curación y el absentismo escolar. OM-85 es eficaz y se tolera bien cuando se administra de forma concomitante con la vacuna antigripal inactivada (VAGi), y ha demostrado reducir los ataques de sibilancias inducidos por las ITR en niños pequeños. Los resultados clínicos muestran que cuanto mayor es el riesgo de IrTR, mayor es el beneficio con OM-85. OM-85 se puede considerar una prometedora opción para añadir a los limitados recursos de los otorrinolaringólogos (ORL) frente a las IrTR y sus complicaciones, como las sibilancias recurrentes y el inicio del asma.

**Palabras clave:** Immunomodulator; Nasopharyngitis; OM-85; Otitis media; Paediatric; Recurrent ENT infections; Rhinosinusitis; rRTIs; Tonsillitis; URTIs

#### Puntos clave

Las infecciones recurrentes del tracto respiratorio (IrTR) son frecuentes en niños pequeños y suponen una carga importante para las familias de los pacientes y el sistema sanitario en general. Como consecuencia, el manejo efectivo de las IrTR supone un gran desafío terapéutico.

La inmadurez inmunológica y los factores ambientales hacen que los niños presenten mayor riesgo de infecciones recurrentes del tracto respiratorio. Las IrTR en etapas

tempranas de la vida (y más concretamente los episodios de sibilancias inducidas por virus) son un factor de riesgo importante para la confirmación del diagnóstico de asma en etapas posteriores.

Una estrategia para el manejo de las IrTR en niños, incluidos los que presentan atopia, consiste en utilizar inmunomodulación inespecífica (es decir, OM-85) para reforzar las defensas naturales del organismo frente a la infección y reducir la inflamación y la hiperreactividad de las vías aéreas.

La eficacia y seguridad del lisado bacteriano por vía oral OM-85, que se ha evaluado en varios estudios clínicos realizados en niños, se puede considerar una estrategia preventiva efectiva para proteger a los niños frente a las infecciones ORL recurrentes y para reducir la carga de la enfermedad para los pacientes y sus familias.

## INTRODUCCIÓN A LAS INFECCIONES RECURRENTE DEL TRACTO RESPIRATORIO

Las infecciones del tracto respiratorio superior (ITRS) suponen aproximadamente el 90% de todas las infecciones, e incluyen rinitis (rinofaringitis y rinosinusitis), amigdalitis, laringitis y otitis media [1–3]. Estas infecciones son muy frecuentes en poblaciones pediátricas, tienen asociada una importante morbilidad (especialmente en los países en desarrollo) y suelen ser recurrentes (IrTR). La definición práctica de las IrTR es la presencia de al menos tres episodios anuales de una determinada infección ORL (oído, nariz y laringe), aunque no hay consenso general sobre los umbrales de recurrencia de todas las infecciones ORL. La otitis media aguda (OMA) se considera recurrente cuando hay tres o más episodios en seis meses, o cuatro o más episodios al año [4]. En el caso de la rinosinusitis crónica (RSC) con exacerbaciones agudas,

la recurrencia se define como cinco o más episodios al año. La definición de amigdalitis recurrente es cinco episodios al año en el primer año de recurrencia, o tres o más episodios al año durante tres años consecutivos [5]. Las IrTR son muy frecuentes en niños por lo demás sanos. En los países desarrollados presentan IrTR hasta el 25% de los niños menores de un año y alrededor del 18% de los niños de 1 a 4 años [6]. Las tasas de incidencia típicas son de 3–8 ITRS al año, y alrededor del 10–15% de los niños experimentan al menos 12 infecciones cada año [7]. Al menos el 80% de las ITR están causadas por virus [6], siendo los más frecuentes el rinovirus humano (RVH), el virus respiratorio sincitial (VRS), los adenovirus y el virus de la gripe [6, 8]. Cuando estas infecciones son recurrentes (IrTR), reducen la calidad de vida tanto de los niños como de sus familias. Un estudio realizado por Jiang y cols. en 420 niños de 2 a 4 años de edad (220 niños con IrTR, 200 niños sanos) mostró que los niños con IrTR presentaban un funcionamiento físico ( $84,2 \pm 12,2$  frente a  $92,6 \pm 6,8$ ), emocional ( $63,4 \pm 13,7$  frente a  $88,7 \pm 13,3$ ), social ( $79,7 \pm 13,0$  frente a  $95,4 \pm 8,0$ ) y escolar ( $67,9 \pm 7,1$  frente a  $89,5 \pm 8,0$ ) estadísticamente inferior ( $p < 0,05$ ) al de los niños sanos, según la puntuación *Generic Core Scale*; véase la Fig. 1 [9].

Además, las IrTR tienen un impacto socioeconómico (visitas médicas frecuentes [10], costes

sanitarios [6], costes de transporte, absentismo laboral/escolar [11]) y se asocian a deterioro de la función pulmonar y reducción de la calidad de vida de los niños y sus familias [9, 12]; véase la Fig. 2.

Otra consideración importante en pacientes pediátricos con IrTR es el daño antibiótico colateral (desarrollo de resistencia bacteriana y alteración de la microbiota) debido al uso indiscriminado de antibióticos [13]. El manejo efectivo de las IrTR para reducir la carga de la enfermedad y evitar un uso excesivo de los antibióticos para estas infecciones (la mayoría de origen vírico) se ha convertido en un gran desafío terapéutico.

Este artículo resume las últimas investigaciones sobre IrTR pediátricas presentadas en el simposio satélite «Infecciones ORL pediátricas recurrentes: ¿podemos hacer más?» del Primer Congreso Mundial de Otorrinolaringología Pediátrica («En el siglo XXI»), celebrado en Buenos Aires, Argentina, el 8 de abril de 2019.

## MÉTODOS

Este artículo se basa en otros estudios realizados previamente y no contiene datos de ningún estudio con participantes humanos o animales realizado por ninguno de los autores. No se hizo una investigación sistemática de la bibliografía,

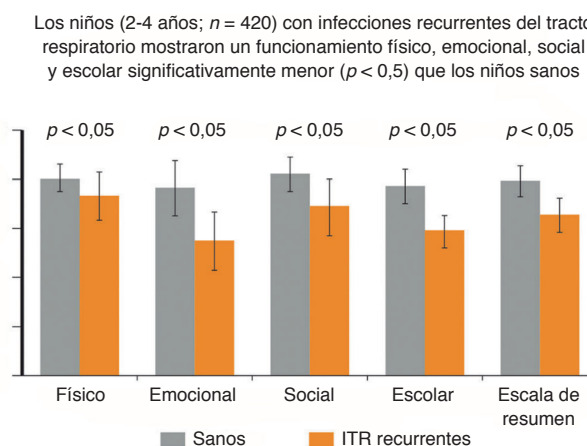

**Fig. 1** Impacto de las IrTR sobre la calidad de vida. Referencia bibliográfica: Jiang y cols. [9]

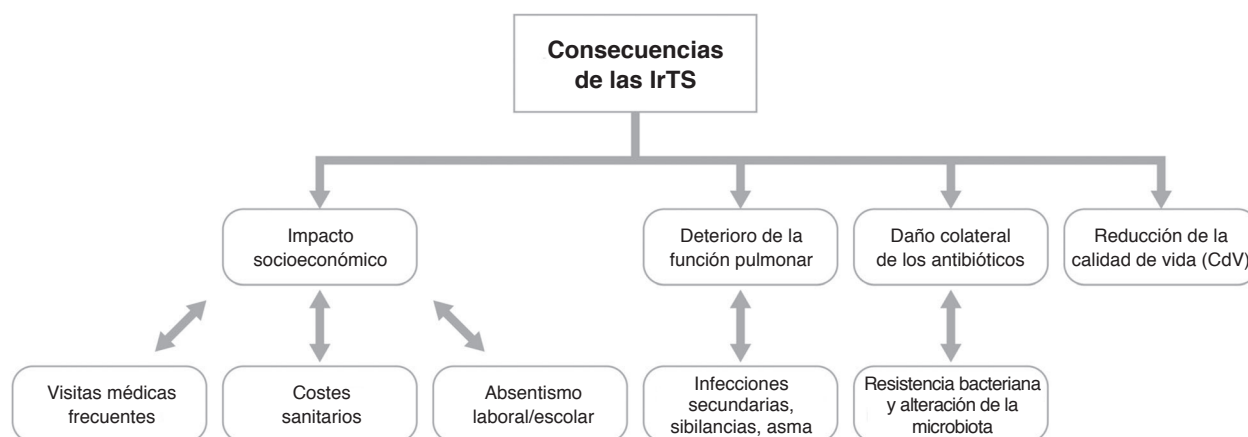

**Fig. 2** Carga de la enfermedad: consecuencias de las infecciones recurrentes del tracto respiratorio. Referencia bibliográfica: Adaptado de Schaad y cols. [4]

sino una revisión de las publicaciones recientes, seleccionando los artículos más relevantes.

### Protección con un inmunomodulador frente a las infecciones de las vías aéreas en pacientes pediátricos

#### *La justificación para utilizar OM-85 se centra en el eje inmunitario intestino-pulmón*

El sistema inmunitario de los humanos cuenta con infinidad de células y moléculas que deben trabajar de manera coordinada, como una orquesta bien afinada, comunicándose entre sí y con las demás células del organismo, con múltiples citoquinas que actúan como mensajeros moleculares. El sistema inmunitario humano se puede subdividir en tres ramas: inmunidad constitutiva, innata y adquirida. La inmunidad innata se puede describir de manera general como una respuesta rápida (de minutos a horas) e inespecífica, frente a una gran variedad de estímulos, sin función de memoria. Por el contrario, la inmunidad adquirida ofrece una respuesta frente a los antígenos más lenta (días a semanas), específica y ajustable, y deja memoria permitiendo al sistema inmunitario (linfocitos T y B) responder de forma más rápida y potente la siguiente vez que se enfrenta al mismo antígeno.

OM-85 es un inmunomodulador oral cuyo principio activo es un extracto de 21 cepas bacterianas

de 5 géneros de bacterias patógenas respiratorias diferentes (8 especies y subespecies). Una estrategia para el manejo de las IrTR en niños en riesgo (incluidos aquellos con atopia) es la inmunomodulación inespecífica con el lisado bacteriano OM-85, que refuerza las defensas naturales del organismo frente a la infección y reduce la inflamación y la hiperreactividad de las vías aéreas [14–16].

La justificación mecanicista del efecto de OM-85 para prevenir enfermedades respiratorias se centra en el eje inmunitario intestino-pulmón. Cuando se administra por vía oral, OM-85 se difunde a través de la mucosa intestinal hacia las placas de Peyer (folículos linfoides organizados del tejido linfoide asociado al intestino [GALT]), activa de forma selectiva las células dendríticas (CD) y modula la respuesta inmunitaria innata y adquirida. Las células presentadoras de antígeno (CPA; por ejemplo, las CD) en las placas de Peyer obtienen muestras de los componentes activos de OM-85. Esto permite la maduración de estas CD (junto a los linfocitos B) pasando a un fenotipo CPA (aumenta la expresión superficial de CD40 y CD80) [18]. La posterior cascada inmunitaria iniciada por las CD provoca que las vías innata y adquirida del sistema inmunitario se dirijan al tejido linfoide asociado a mucosas (por ejemplo, mucosa bucal, respiratoria e intestinal [17]), con la consiguiente producción de anticuerpos policlonales [18–22].

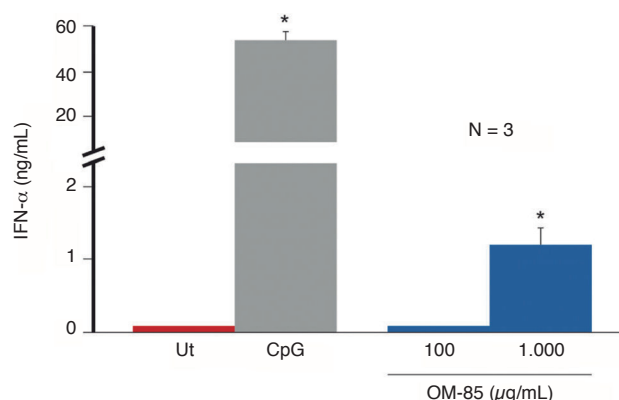

**Fig. 3** Efecto de OM-85 sobre la producción de IFN- $\alpha$ . \* $p < 0,05$ . CPG: 5'-C-fosfato-G-3; NT: no tratados. Referencia bibliográfica: Parola y cols. [19]

OM-85 afecta a la inmunidad innata aumentando: los péptidos antimicrobianos (PAM); el reclutamiento de neutrófilos mediante quimioquinas (CCL2, CCL3, CXCL1, CXCL5, CXCL6, CXCL8); las células *natural killer* (linfocitos citotóxicos), los monocitos y los neutrófilos, que son importantes para la fagocitosis; y la liberación de citoquinas antivíricas (p. ej., interferón [IFN]- $\alpha$  e IFN- $\beta$ ) [18-20].

Respecto a la inmunidad adquirida, OM-85 aumenta la interacción entre linfocitos T y células dendríticas, y también aumenta los linfocitos T citotóxicos y la producción de IFN- $\gamma$ . Además afecta a la producción de anticuerpos por los linfocitos B, especialmente las inmunoglobulinas (Ig) IgG e IgA (IgA es la mejor defensa de anticuerpos en las secreciones salivales y respiratorias), y aumenta la maduración de los linfocitos B [18].

### OM-85 confiere protección frente a las infecciones víricas y bacterianas

Los estudios de esta sección se han realizado *in vitro* e *in vivo*; «n» representa el número de experimentos repetidos.

OM-85 actúa sobre las vías innata y adquirida del sistema inmunitario, y confiere protección frente a infecciones víricas y bacterianas. OM-85 aumenta la expresión de las principales citoquinas antivíricas (IFN- $\alpha$ , IFN- $\beta$  e IFN- $\gamma$ ),

ayudando a crear un estado antivírico basal; véanse las Figs. 3, 4 [20-22].

Otros mecanismos por los que OM-85 aumenta la respuesta inmunitaria antivírica son: aumento de las  $\beta$ -defensinas humanas (receptores de la superficie celular y defensa antimicrobiana), aumento de células mononucleares de sangre periférica (CMSP) e inicio de una respuesta antivírica policlonal inespecífica (anticuerpos frente al VRS y el virus influenza) en suero y vías aéreas. Se ha demostrado que OM-85 reduce la carga vírica en el tejido pulmonar 5 días después de la infección por el virus de la gripe, en comparación

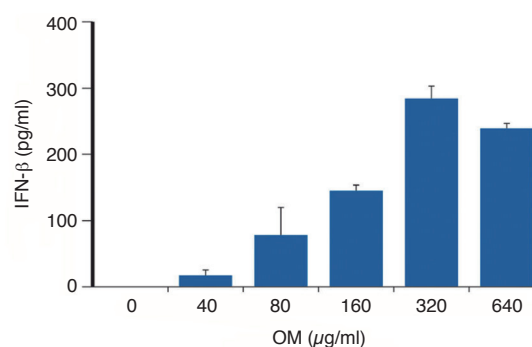

**Fig. 4** Efecto de OM-85 sobre la producción de IFN- $\beta$  a diferentes concentraciones (40 a 640 mcg/ml). El aumento de producción de IFN-beta se corresponde con el aumento en la concentración de OM-85. \*\*\* $p \leq 0,001$ . Estos resultados *in vitro* representan la media  $\pm$  DE (n = 3 réplicas técnicas). Referencia bibliográfica: Dang y cols. [20]

con un grupo de control sin tratamiento, logrando un rápido control de la infección en un modelo de infección *in vivo* bien definido [23] (véase la Fig. 5), así como reducción de la infección por RVH en células epiteliales bronquiales humanas con asma y de control.

OM-85 también ha demostrado un efecto antibacteriano (p. ej., frente a *Streptococcus pneumoniae* o *Klebsiella pneumoniae*) y protege frente a las infecciones bacterianas secundarias [23]; véase la Fig. 6. OM-85 aumenta la respuesta inmunitaria antibacteriana liberando IgA e IgG policlonales inespecíficas en suero y vías aéreas, y mejorando las puntuaciones de la enfermedad

en modelos animales tras la exposición al virus de la gripe [21, 23].

### Reducción del estado inflamatorio crónico

Los tratamientos efectivos para las IrTR deben lograr un estado antivírico además de tener efecto antibacteriano, para que el paciente evite las infecciones respiratorias víricas frecuentes y las complicaciones respiratorias bacterianas secundarias, con el fin de reducir la morbilidad global asociada. El tratamiento debe controlar la inflamación para reducir el daño tisular, mediante un procedimiento de dos etapas: de combate y de control.

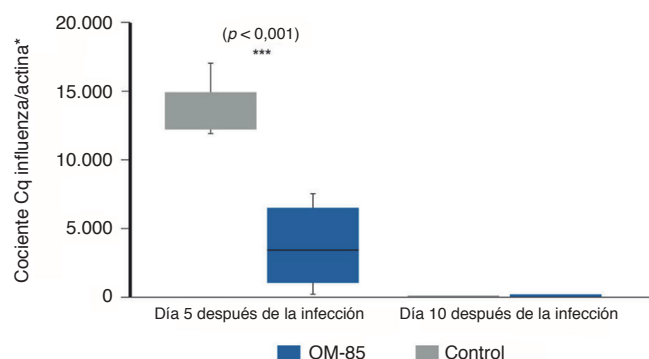

**Fig. 5** Efecto de OM-85 frente a las infecciones víricas en un modelo de infección *in vivo*. La carga vírica en tejido pulmonar se determinó los días 5 y 10 después de la infección por el virus de la gripe (*Influenza*). Los datos son representativos de 2-5 experimentos con 5-10 ratones por momento de

valoración. Las barras de error representan el rango entre los valores mínimos y máximos. El análisis estadístico se realizó utilizando la prueba *t* de Student. \*\*\* $p < 0,01$ . Referencia bibliográfica: Pasquali y cols. [21]

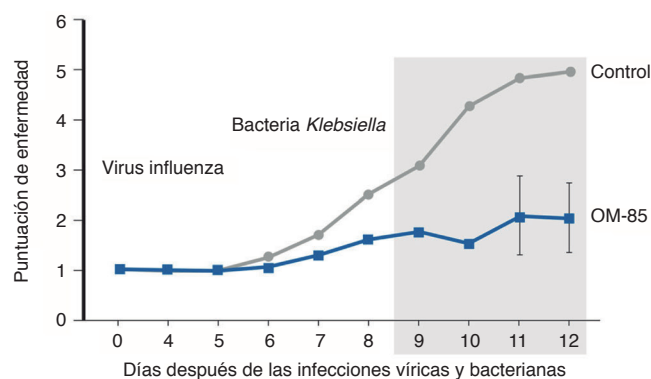

**Fig. 6** Efecto de OM-85 frente a las infecciones bacterianas secundarias en un modelo de infección *in vivo*. Puntuación de enfermedad en ratones tratados con el control o con OM-85, tras la infección por el virus de la gripe y *Klebsiella pneumoniae*.

Los datos son representativos de tres experimentos con 5-10 ratones por momento de valoración. Las barras de error representan la DE. Referencia bibliográfica: Pasquali y cols. [21]. <https://creativecommons.org/licenses/by-nc/4.0/>



Además de crear un estado de pre-alerta en la etapa de infección, se ha demostrado que OM-85 regula un descenso del sistema inmunitario para ayudar en la etapa de inflamación crónica de las vías aéreas (como en la RSC) [24, 25], reduciendo los niveles de citoquinas proinflamatorias (p. ej., interleuquina [IL]-1 $\beta$ ) de manera dependiente de la dosis [20], disminuyendo el reclutamiento de células inflamatorias [22] y aumentando los niveles de citoquinas antiinflamatorias (p. ej., IL-10) [19], para reducir el daño tisular. Otros efectos de OM-85 son el aumento de las células dendríticas tolerogénicas (CD103<sup>+</sup>), la activación de los linfocitos T o la conversión a Treg, y la reducción de las CD tipo 2 (ligando de ICOS) [18, 21].

OM-85 también podría ayudar a la maduración del sistema inmunitario en niños al corregir el desequilibrio Th1/Th2, mediante aumento de las citoquinas de Th1 (IFN- $\gamma$ ), aumento de las citoquinas de Treg (IL-10) y reducción de las citoquinas de Th2 (IL-4, IL-5, IL-13) [16, 18, 24]. La corrección de este desequilibrio orientado hacia Th2 y otras actividades antiinflamatorias (como reducción del infiltrado celular inflamatorio, los eosinófilos, los neutrófilos, los macrófagos y los linfocitos T y B [18]) podría ayudar a reducir las respuestas atópicas relacionadas con las sibilancias y el asma. Por ejemplo, los niveles elevados de IL-10 se asocian a reducción de la inflamación de las vías aéreas, el consiguiente remodelado tisular y disminución de la hipersecreción. Estos efectos, combinados con el menor riesgo de IrTR (que predisponen al asma y causan exacerbaciones), constituyen el marco mecanicista para la reducción del riesgo de estas enfermedades [16, 18].

## NUEVOS DATOS SOBRE LA PREVENCIÓN DE LAS INFECCIONES ORL EN NIÑOS

### Necesidades no resueltas en el manejo de las infecciones del tracto respiratorio recurrentes en niños

El manejo estándar actual de las IrTR en niños se centra principalmente en el tratamiento de

las ITR, incluyendo la reducción de los síntomas [26, 27]. Idealmente, el foco debería estar en la prevención de las ITR, en lugar de su tratamiento, y esto se tendría que basar en una buena comprensión de los factores de riesgo. Existe una importante necesidad no resuelta para el diagnóstico rápido y correcto, así como el uso inteligente de múltiples estrategias preventivas complementarias, con el fin de reducir la carga global de la enfermedad y el excesivo uso y abuso de los antibióticos para estas ITR mayoritariamente víricas [4].

### Necesidad de estrategias preventivas

Para reducir la tasa de infección en esta población pediátrica frágil se deben implementar medidas de profilaxis generales y otras medidas preventivas habituales. Es muy recomendable prevenir las recurrencias mediante eliminación de los factores de riesgo ambientales y modificación conductual de los pacientes [6, 28]. Por desgracia, estas medidas solo son parcialmente efectivas. Las intervenciones conductuales (p. ej., evitar factores de riesgo) no siempre son aplicables o seguidas por los pacientes. Las estrategias alternativas incluyen intervenciones médicas dirigidas (como el uso sistemático de los calendarios de vacunación infantil, cuando esté indicado o recomendado) y las intervenciones quirúrgicas (p. ej., amigdalectomía en caso de faringoamigdalitis recurrente), aunque estas indicaciones están limitadas y es importante tener en cuenta los posibles riesgos asociados [5].

### Eficacia de OM-85 en niños

Como una posible estrategia complementaria para mejorar la protección de los niños frente a las IrTR se ha sugerido el refuerzo de la actividad del sistema inmunitario mediante inmunomodulación inespecífica en pacientes pediátricos [18]. El lisado bacteriano por vía oral OM-85 ha demostrado su eficacia clínica para reducir las ITR en niños con alto riesgo de IrTR [29–32]. El régimen de dosificación de OM-85 utilizado en

estudios de 6 o 12 meses para la prevención de las ITR es de 10 días/mes durante 3 meses.

En niños con IrTR incluidos en un estudio aleatorizado, doble ciego y controlado con placebo, la proporción de pacientes sin ITR (la variable principal) fue significativamente mayor en el grupo tratado con OM-85 comparado con el grupo de placebo (véase la Fig. 7). Se registró un 35% menos de infecciones totales con OM-85 frente a placebo en todos los niños del estudio y un 28% menos en los niños de menos de 6 años [29].

OM-85 también se ha asociado a menos ITR comparado con placebo (143 frente a 299;

diferencia del 52%;  $p < 0,001$ ; variable principal) a los 6 meses en un estudio aleatorizado, doble ciego y controlado con placebo, realizado en niñas de 6 a 13 años [31]. OM-85 redujo el número de infecciones en cada paciente de 494 a 143, mientras que con placebo se redujo el número de infecciones de 509 a 299 ( $p < 0,001$  para ambas comparaciones) [31]. Se registraron menos infecciones cada mes con OM-85 comparado con placebo ( $p < 0,05$  los meses 2, 3, 4 y 6) [31].

Se ha publicado que OM-85 reduce el uso de antibióticos, el tiempo hasta la curación y el absentismo escolar; véase la Fig. 8 [31].

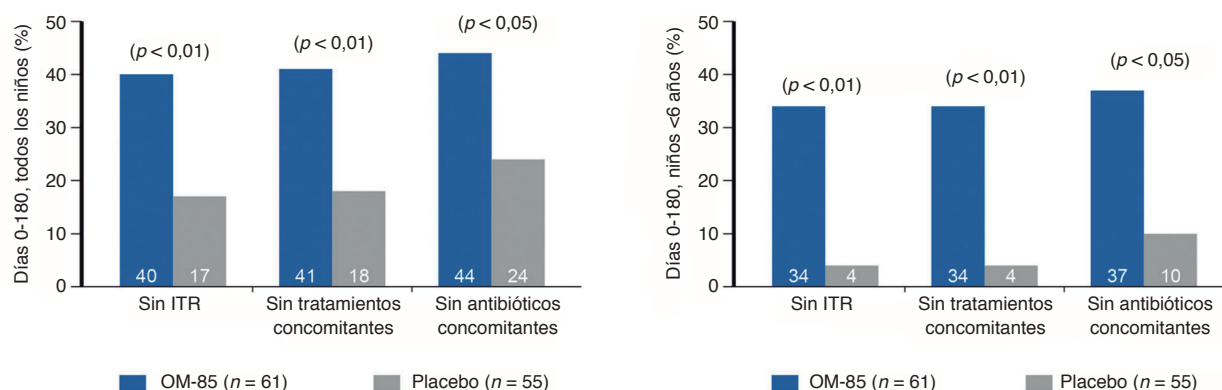

**Fig. 7** Efecto de OM-85 sobre la incidencia de ITR y el uso de tratamientos concomitantes en pacientes pediátricos con IrTR. Reproducido con permiso de Paupé Jean.

Immunotherapy with an Oral Bacterial Extract (OM-85 BV) for Upper Respiratory Infections. *Respiration*. 1991; 58: 150-154. Copyright© 1991 Karger Publishers, Basilea, Suiza

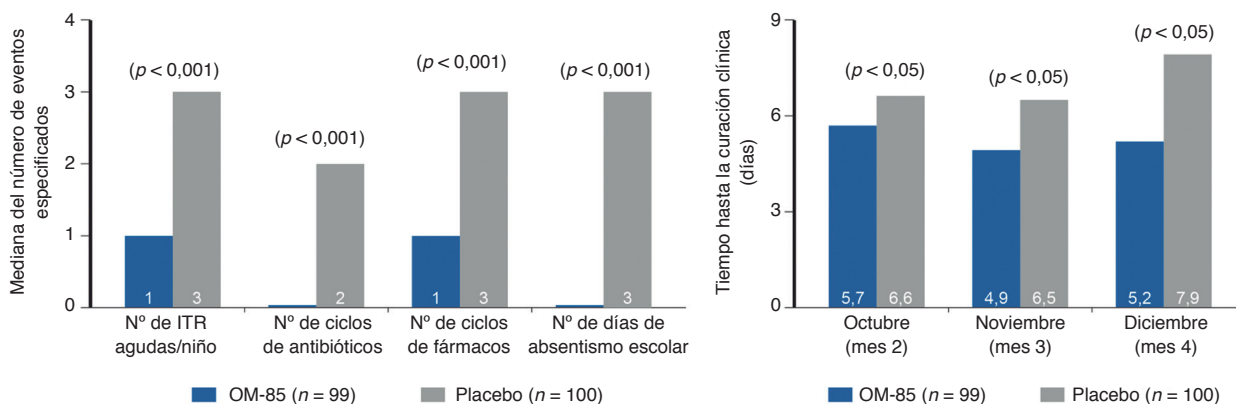

**Fig. 8** Efecto de OM-85 sobre el uso de antibióticos, el tiempo hasta la curación y el absentismo escolar en pacientes pediátricos con IrTR. Número de pacientes: grupo de OM-85 n = 99; grupo de placebo n = 100. La duración del estudio fue de 6 meses. Reimpreso de *Clinical Therapeutics*, 22, Jaime V.

Jara-Pérez, Arturo Berber, Primary prevention of acute respiratory tract infections in children using a bacterial immunostimulant: a randomised open-label trial, 748-759. Copyright (2000), con permiso de Elsevier.



También se ha observado que OM-85 reduce significativamente el número y duración de las ITR agudas (variable principal), con 131 ITR agudas en pacientes pediátricos que recibieron OM-85 frente a 224 en los que recibieron placebo en un estudio aleatorizado, doble ciego y controlado con placebo [32]. La media de las ITR por paciente fue significativamente menor con OM-85 a los 12 meses: 5,0 frente a 8,0 ( $p < 0,001$ ), un 38% inferior en todos los pacientes; y 4,9 frente a 8,3 ( $p < 0,01$ ), un 41% inferior en los pacientes de menos de 6 años. La duración total de las ITR agudas fue significativamente menor con OM-85 comparado con placebo: mediana 30,5 frente a 55,0 días ( $p < 0,001$ ), un 45% inferior (todos los pacientes). Con OM-85 también se registró una proporción mayor (un 57% mayor;  $p < 0,001$ ) de niños sin recurrencias (menos de seis ITR agudas) y menos consumo de antibióticos (un 44% menor;  $p < 0,001$ ) [32].

Hace casi una década, el profesor Schaad y la Cochrane Collaboration publicaron dos metanálisis independientes que incluyeron varios ensayos clínicos controlados y aleatorizados en población pediátrica, y los niños tratados con OM-85 presentaron de manera constante un número significativamente menor de casos de IrTR [33, 34]. En el metanálisis publicado por Schaad se demostró una reducción del 35,5% en el número medio total de ITR agudas pediátricas con OM-85, comparado con placebo [33]. Esto se confirmó en 2012 en un metanálisis actualizado de 852 niños, realizado por el grupo de la Cochrane Collaboration, en el que el inmunomodulador OM-85 mostró una reducción significativa del 35,9% en las ITR agudas totales [34].

### **Uso concomitante de OM-85 y vacuna antigripal inactivada**

En un estudio prospectivo, aleatorizado y simple ciego, realizado en 68 niños de 36 a 59 meses con IrTR y al menos una VAGi previa, el uso concomitante de 3,5 mg/día de OM-85 y la vacuna antigripal inactivada (VAGi) mostró un beneficio clínico superior comparado con la vacuna en monoterapia [35]. OM-85 se administró una

vez al día, 10 días al mes, durante 3 meses, y la VAGi se administró 15 días después del primer ciclo de 10 días. En el grupo de OM-85 más VAGi hubo mayor reducción de las ITR inferior (67%;  $p < 0,05$ ), las ITR superior (35%;  $p < 0,05$ ), el uso de antibióticos (72%;  $p < 0,05$ ) y los días de absentismo escolar (52%;  $p < 0,05$ ), comparado con el grupo que solo recibió VAGi. Estos resultados muestran que OM-85 se puede administrar junto a la VAGi para reducir las IrTR en esta población pediátrica de riesgo, sin que afecte a la inmunidad humoral de la vacuna. El seguimiento durante 14 días tras la vacunación con VAGi, con o sin OM-85, mostró que la administración de OM-85 junto a VAGi se toleró bien a corto plazo [35]. Los acontecimientos adversos graves locales y sistémicos fueron similares en ambos grupos, y no se registraron acontecimientos adversos graves.

### **OM-85 y sibilancias inducidas por virus**

Los niños con IrTR a menudo sufren sibilancias recurrentes, que es un factor de riesgo importante para el desarrollo de asma en etapas posteriores de la vida. En un estudio doble ciego, aleatorizado, controlado con placebo y en grupos paralelos, realizado en 75 niños de 1 a 6 años con rinofaringitis recurrente y sibilancias inducidas por virus, la profilaxis con OM-85 3,5 mg/día (OM-85 administrado los 10 primeros días del mes durante tres meses consecutivos) dio lugar a un número significativamente menor de episodios de rinofaringitis (37,5%;  $p < 0,001$ ) y una reducción significativa de los ataques de sibilancias (37,9%;  $p < 0,001$ ; variable principal) y de su duración ( $p < 0,001$  para la duración acumulada de los ataques y para la duración de un único ataque), comparado con placebo; véase la Fig. 9 [36].

El impacto del tratamiento observado a los 3 meses se mantuvo durante 12 meses después de la prescripción, demostrando que OM-85 previene los ataques de sibilancias en niños pequeños [36]. La reducción de las rinofaringitis recurrentes se observó a los 3 meses y se mantuvo hasta los 12 meses.

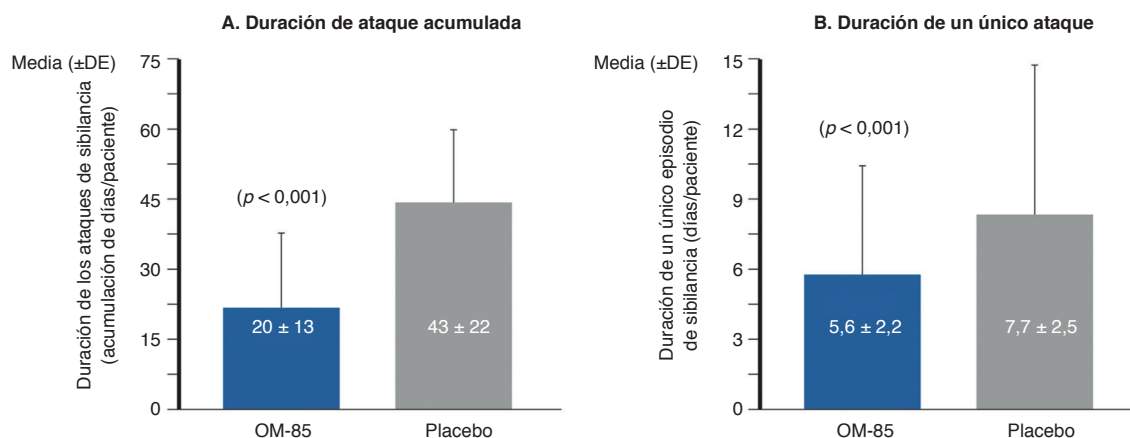

**Fig. 9** Efecto de OM-85 sobre la duración de ataques de sibilancias acumulada y la duración de un único ataque de sibilancias en pacientes pediátricos con IrTR. Reimpreso de *Journal of Allergy and Clinical Immunology*, 126, Cem Hasan

Razi, Koray Harmancl, Ayhan Abaci, Osman Özdemir, Şamil Hızlı, Rahime Renda, Fersin Keskin, The immunostimulant OM-85 BV prevents wheezing attacks in preschool children, 763-769. Copyright (2010), con permiso de Elsevier

Un metanálisis reciente de Yin, que incluyó 4851 pacientes de varios estudios, confirmó el beneficio clínico de OM-85, comparado con la ausencia de tratamiento, para la reducción de la duración de las sibilancias [37].

Datos recientes de un estudio observacional retrospectivo en 400 niños de 3 a 6 años con IrTR (200 recibieron OM-85, 200 sin tratamiento) indicaron que OM-85 administrado antes del invierno puede reducir de forma efectiva y segura el riesgo de nuevos episodios de ITR (reducción de los episodios de sibilancias y los ciclos de antibióticos) en esta población pediátrica y que un segundo ciclo de OM-85 al siguiente año puede ser útil para mantener la protección, especialmente cuando el diagnóstico de IrTR se hace en niños pequeños cuyos sistemas inmunitarios todavía necesitan tiempo para madurar [38]. En este estudio OM-85 se toleró bien: no se registraron acontecimientos adversos graves durante cada uno de los ciclos de OM-85. Los resultados también confirmaron el perfil de seguridad de OM-85 cuando se administra junto a la VAGi (n = 49).

Un estudio aleatorizado, doble ciego y controlado con placebo, para evaluar la eficacia y seguridad de OM-85 en 288 niños de 1 a 6 años con IrTR, mostró que OM-85 puede reducir

significativamente el riesgo de nuevas infecciones en estos pacientes (variable principal), limitando la carga total de estas enfermedades con independencia del historial de atopia/alergia [39]. Durante el periodo de estudio se diagnosticó al menos un nuevo episodio de ITR en más del 65% de los niños que recibieron placebo y solo en una tercera parte de los que recibieron OM-85. La eficacia fue mayor en los niños con alto riesgo de ITR (el 50% de los pacientes que recibieron placebo presentaron al menos tres episodios de rinofaringitis/faringitis, comparado con el 21% de los pacientes con OM-85), y las recurrencias en niños tratados se redujeron aproximadamente un 50% comparado con los pacientes sin tratamiento.

## LECCIONES APRENDIDAS DE LA PRÁCTICA CLÍNICA EN CASOS RECURRENTES DE OTITIS MEDIA AGUDA, RINOSINUSITIS CRÓNICA Y AMIGDALITIS AGUDA

### Retos de las infecciones ORL pediátricas recurrentes en la práctica clínica

Aproximadamente el 90% de los niños presenta OMA antes de llegar a la edad escolar, de los

cuales la mitad presenta la infección durante el primer año de vida [40]. Hasta el 5% de los niños con ITRS progresa a rinosinusitis aguda, y algunos pueden desarrollar enfermedad respiratoria crónica, como RSC [41]. La amigdalitis también es muy frecuente durante la infancia y la recurrencia puede ser indicación de amigdalectomía, aunque se deben tener en cuenta los riesgos asociados al procedimiento.

### Otitis media aguda recurrente

Para tratar a los pacientes pediátricos con otitis media aguda recurrente (OMAr) de manera efectiva, los otorrinolaringólogos deben considerar a los pacientes de manera global, incluyendo factores médicos, sociales y ambientales. Los factores y los hábitos que influyen en la incidencia de OMAr son: respiración bucal, lactancia materna, uso de chupete y biberón, ser fumador pasivo, acudir a la guardería, el cloro y los algicidas, factores socioeconómicos y el hacinamiento en las viviendas. Los tratamientos farmacológicos incluyen diferentes opciones, incluyendo suero salino hipertónico, corticoides tópicos, antihistamínicos, inmunomoduladores inespecíficos, vacuna antigripal específica (en niños mayores de 6 meses), vacuna neumocócica, inmunoterapia específica para la alergia, fármacos para el reflujo gastroesofágico y antibióticos profilácticos (en casos especiales de inmunodeficiencia). Otros tratamientos asociados a esta patología son el tratamiento foniátrico dirigido a la respiración, la deglución y la funcionalidad de la trompa de Eustaquio, y el tratamiento ortodóncico y ortopédico.

Las crecientes evidencias científicas sobre inmunomodulación para prevenir la OMAr han dado lugar a un cambio de estrategia para el manejo de pacientes pediátricos con esta patología, pasando del tratamiento a la prevención. La eficacia y seguridad del lisado bacteriano OM-85 se ha evaluado en varios estudios clínicos pediátricos.

Aunque en dos estudios aleatorizados y controlados con placebo el número de casos

de otitis media registrados fue pequeño (8/99 y 25/100 [31] en el grupo de OM-85 y 3/26 y 14/28 [32] en el grupo de placebo), los episodios de OMA fueron sustancialmente menores (68-75%;  $p < 0,001$ ) en el grupo tratado con OM-85 que en los que recibieron placebo [31, 32].

Un estudio de intervención retrospectivo en 100 niños < 13 años con OMAr confirmada mostró que OM-85 (3,5 mg/día) se asoció a ausencia de comorbilidades en el 81% de los pacientes (el 19% restante presentaba comorbilidades craneofaciales o patologías inmunoalérgicas confirmadas en laboratorio). El 94% de los pacientes (76 de 81) mostró un buen cumplimiento terapéutico (se debía administrar con el estómago vacío y el cumplimiento fue mayor cuando se administró justo después del colegio, en lugar de hacerlo a primera hora de la mañana) [42]. En total, 61 de 76 pacientes pediátricos con buen cumplimiento terapéutico (80%) no presentaron OMAr después del tratamiento con OM-85 (comparando el número de episodios anuales de OMA antes y después del tratamiento en cada paciente). Además, el 49% de los pacientes pediátricos no necesitó tratamiento antibiótico durante los 6 primeros meses, y el 34% tampoco lo necesitó en los 12 primeros meses. Los resultados del estudio mostraron que los pacientes atópicos, más propensos a sufrir complicaciones como la OMAr, podrían beneficiarse más de la intervención inmunomoduladora, y se confirma un mayor beneficio clínico de la intervención en estos niños de riesgo.

### Rinosinusitis crónica

La inmunomodulación con OM-85 también ha demostrado beneficios en los pacientes pediátricos con RSC. En un ensayo clínico aleatorizado, doble ciego y controlado con placebo, que incluyó 55 niños de 4-12 años con exacerbación aguda de la RSC, OM-85 redujo significativamente el número (un 65%) y la duración total (un 64%) de episodios agudos a los 6 meses, en comparación con placebo [25]. Históricamente, la mejora sintomática debida a la prevención de

los episodios agudos suele observarse a los dos meses de tratamiento. Aquí los síntomas como tos, secreción nasal y congestión nasal mejoraron a los 15 días de tratamiento. En el caso de los síntomas de tos y congestión nasal, la mejoría se mantuvo y fue aumentando hacia el 5° mes después del inicio del tratamiento y al final del estudio (6° mes); véase la Fig. 10.

También se observó que los episodios de RSC fueron significativamente menos (65%;  $p < 0,05$ ) y más cortos (73%;  $p < 0,01$ ). Los niveles séricos de IgA fueron significativamente mayores con OM-85 que con placebo a los 5 meses ( $p < 0,01$ ) y a los 6 meses ( $p < 0,05$ ).

### Rinosinusitis subaguda

Otro estudio aleatorizado, doble ciego y controlado con placebo, realizado en 56 niños de 18 meses a 9 años con rinosinusitis subaguda, demostró menor tiempo hasta la mejora/curación y una mejora clínica más pronunciada (variable principal) con OM-85 (3,5 mg/día durante los primeros 10 días de 3 meses consecutivos) en comparación con placebo (tiempo hasta la mejora/curación 44% frente al 24%;

$p < 0,05$ ) y, en consecuencia, se redujo el número total de días con enfermedad [43].

Además de reducir el número de exacerbaciones, OM-85 redujo significativamente el uso de medicación concomitante (21%;  $p < 0,05$ ), incluyendo antibióticos (29%;  $p < 0,05$ ), en comparación con placebo. La duración del tratamiento concomitante también se redujo con OM-85 comparado con placebo (24%;  $p < 0,05$ ).

La diferencia en la puntuación clínica entre los grupos de OM-85 y placebo se observó desde el día 1. A partir del día 15 se observó un efecto más pronunciado sobre la puntuación clínica, que se mantuvo a un nivel estadísticamente significativo a lo largo del tiempo.

### Amigdalitis aguda

En un estudio observacional retrospectivo, realizado en 177 niños de 1 a 15 años con amigdalitis aguda recurrente, OM-85 (3,5 mg/día durante los primeros 10 días de 3 meses consecutivos) disminuyó la frecuencia de los episodios de amigdalitis aguda a corto plazo y redujo la amigdalitis recurrente a largo plazo [44]. Tras una mediana de

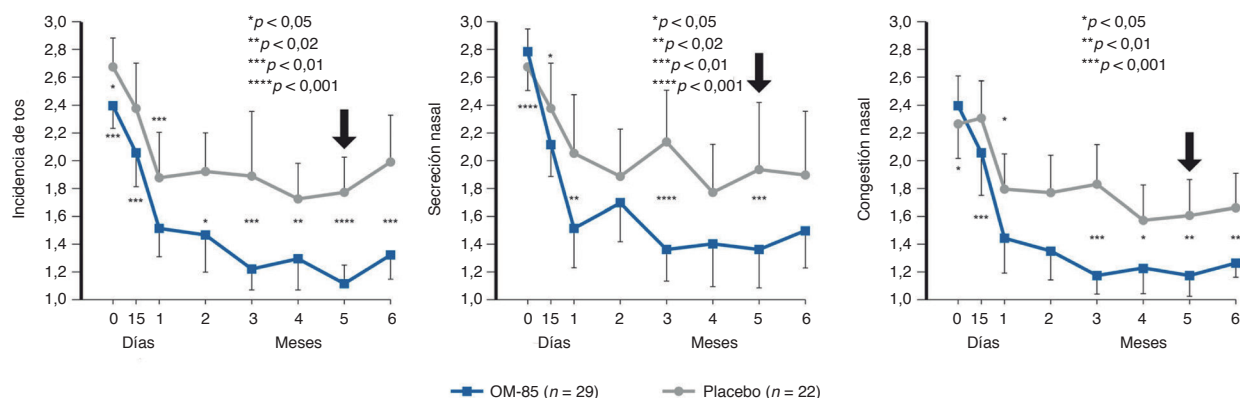

**Fig. 10** Efecto de OM-85 sobre los síntomas de rinosinusitis crónica en pacientes pediátricos. Presencia según una escala de valoración de 3 puntos: 1 = nada; 2 = moderadamente frecuente (semanalmente); 3 = frecuente (a diario). Evaluación mediante una escala de valoración de 4 puntos: 0 = nada; 1 = claro; 2 = mucoso; 3 = purulento. Frecuencia e intensidad: para la congestión grave: 1 = nada; 2,5 = moderadamente

frecuente (semanalmente); 3 = frecuente (a diario); para la congestión leve: 1 = nada; 1,5 = moderadamente frecuente (semanalmente); 3 = frecuente (a diario). Reproducido con permiso de Zagar, Sasa and Löfler-Badzek, Dagmar. Broncho-Vaxom® in Children with Rhinosinusitis: A Double-Blind Clinical Trial. ORL. 1988; 50: 397-404. Copyright© 1988 Karger Publishers, Basilea, Suiza



9 meses de seguimiento, no se requirió amigdalectomía en > 50% de los pacientes tratados [44]. En total, el 75,6% de los pacientes tratados a los que se hizo seguimiento respondieron al tratamiento: respuesta total (sin episodios nuevos ni amigdalitis recurrente) 51,2%; respuesta parcial (reducción de las nuevas exacerbaciones) 24,4%. Esto indicaba una reducción significativa de la amigdalitis recurrente.

### **Seguridad y tolerabilidad de OM-85**

OM-85 ha mostrado un buen perfil de seguridad, que se ha mantenido sin cambios en su naturaleza o su frecuencia durante más de 30 años de uso en la práctica clínica pediátrica, así que está respaldado por un uso prolongado y evidencias médicas sólidas. Los acontecimientos adversos observados durante el tratamiento con OM-85 son principalmente no graves y transitorios, con riesgos conocidos y controlables [37, 38]. Los más frecuentes son dolor de cabeza, síntomas gastrointestinales y erupciones cutáneas.

En un estudio prospectivo realizado en niños con déficit de IgA y ataques febriles, el tratamiento con el inmunomodulador OM-85 no afectó a los marcadores de autoinmunidad clínicos o analíticos [45], y fue efectivo y bien tolerado en niños con déficit leve de IgG [34]. OM-85 también fue bien tolerado cuando se administró en combinación con la VAGi, no interfirió con los títulos de anticuerpos de la vacuna y no se observó efecto sobre la inmunidad humoral [35, 38, 39].

## **DISCUSIÓN Y CONCLUSIONES**

Durante el desarrollo del sistema inmunitario cabe esperar que aparezcan algunas ITR benignas. No obstante, la inmadurez inmunológica y los factores ambientales (incluyendo el contacto social frecuente, la exposición a contaminación y la ausencia de lactancia materna) se asocian a mayor riesgo de IrTR en niños. Estas infecciones recurrentes al inicio de la vida (especialmente los episodios de sibilancias inducidas por virus) son un importante factor de riesgo

para el desarrollo de asma en etapas posteriores de la vida.

El inmunomodulador oral OM-85 actúa sobre las vías innata y adquirida del sistema inmunitario, reduciendo el riesgo de infecciones víricas y bacterianas, y controla también la inflamación, reduciendo así el daño tisular. OM-85 ha demostrado buena tolerabilidad y eficacia clínica para reducir el número y la duración de las ITR en niños. También se ha publicado que reduce el uso de medicación concomitante (incluidos los antibióticos), el tiempo hasta la curación y el absentismo escolar. OM-85 es eficaz y se tolera bien cuando se administra de forma concomitante con la VAGi, y ha demostrado reducir los ataques de sibilancias inducidos por las infecciones en niños pequeños. El efecto regulador reductor de OM-85 podría contribuir a su buen perfil de tolerabilidad en niños con esta patología recurrente.

Otra consideración importante es el uso concomitante de OM-85 y las vacunas infantiles rutinarias (incluida la VAGi). Considerando el mecanismo de acción de este fármaco, su uso a largo plazo en niños en la práctica clínica y los datos de farmacovigilancia, no se han registrado interacciones farmacológicas ni problemas de seguridad con las vacunas infantiles administradas junto a OM-85. Este fármaco está registrado en muchos países y la información técnica no incluye contraindicaciones sobre su uso con las vacunas infantiles.

Los metanálisis de los estudios con bases de datos disponibles indican que los inmunomoduladores no son muy efectivos para prevenir una ITR aguda ocasional, pero sí lo son para prevenir las infecciones recurrentes [33, 34, 46]. Además, el metanálisis de Schaad mostró que el efecto beneficioso de OM-85 es proporcional al número de ITR en los 12 meses previos y es mayor en los niños más pequeños [37]. Así pues, cuanto mayor es el riesgo de IrTR, mayor es el beneficio con OM-85. La recurrencia de las ITR es muy frecuente en los primeros años de vida. OM-85 se asocia a beneficios enormemente relevantes en los primeros 6 años de vida [47].



OM-85 confiere un estado de pre-alerta, con protección temprana frente a la infección vírica y bacteriana, y después regula la inflamación para minimizar el daño tisular del paciente, logrando así una respuesta inmunitaria equilibrada.

Recientemente se ha recomendado OM-85 como medicación adyuvante al tratamiento estándar en adultos con RSC sin pólipos [48, 49] y en un documento de consenso publicado recientemente se mencionó como producto efectivo para prevenir las ITR en niños [50]. Una revisión sistemática reciente concluyó que OM-85 se puede considerar una opción prometedora dentro de los limitados recursos con los que cuentan los otorrinolaringólogos al tratar las infecciones ORL pediátricas y sus complicaciones [51].

Para que el tratamiento de las IrTR en pacientes pediátricos progrese es necesario disponer de una adecuada comprensión del sistema inmunitario y generar datos de investigaciones de alta calidad sobre el uso de estrategias inmunomoduladoras. La recurrencia de las ITR es muy frecuente en los primeros años de vida y hay evidencias clínicas considerables que respaldan a OM-85 como una opción interesante para el tratamiento de las IrTR pediátricas, especialmente porque no hay otros inmunomoduladores efectivos que se puedan administrar en los primeros años de vida.

La evidencia de la seguridad y eficacia clínica de OM-85 en pacientes pediátricos con IrTR (incluyendo el uso concomitante con vacunas infantiles) es suficientemente sólida (p. ej., véase [43]) como para recomendar que se hagan más estudios en niños de alto riesgo que podrían beneficiarse con OM-85.

Por supuesto, la utilización de moduladores no es la única manera de reducir un uso innecesario de los antibióticos en las IrTR y no se debe infravalorar la importancia de las iniciativas de formación sobre antimicrobianos, para mejorar la idoneidad de las prescripciones.

## AGRADECIMIENTOS

**Financiación.** El simposio fue organizado durante el Primer Congreso Mundial de Otorrinolaringología Pediátrica, celebrado los días 6–10 de

abril de 2019, y fue financiado por OM Pharma Switzerland, una empresa del Grupo Vifor Pharma. Las tarifas de servicio rápido también fueron financiadas por OM Pharma Switzerland.

**Asistencia editorial.** La Dra. Brigitte Scott, de MarYas Editorial Services, proporcionó la asistencia editorial para la preparación de este artículo. Esta asistencia fue financiada por OM Pharma Switzerland, una empresa del Grupo Vifor Pharma.

**Autoría.** Todos los autores citados cumplen los criterios del *Comité Internacional de Editores de Revistas Médicas* (ICMJE) en relación con la autoría de este artículo, asumen la responsabilidad por todo el trabajo en su conjunto y han dado su autorización a la publicación de esta versión.

**Declaración de conflictos de intereses.** Ricardo Marengo declara ser un conferenciante contratado por *OM Pharma Ltd.* José Antonio Ortega Martell declara ser miembro activo del *Colegio Mexicano de Inmunología Clínica y Alergia* (CMICA), la *Confederación Nacional de Pediatras de México* (CONAPEME), la *American Academy of Allergy, Asthma and Immunology* (AAAAI) y la *World Allergy Organization* (WAO), COMPEdia, CONICA y SLAAI. También se le invita a presentar en conferencias y revisiones en colaboración con las siguientes compañías farmacéuticas: Vifor Pharma, UCB Pharma, Sanofi Aventis, AstraZeneca, Glaxo Smith Kline y Pierre Fabre Med. Susanna Esposito declara haber recibido subvenciones para investigación de Abbott, DMG, Glaxo Smith Kline, Merck, Sanofi y Vifor Pharma, así como honorarios por presentaciones científicas y por formar parte del comité de asesores de Glaxo Smith Kline, Merck, Pfizer, Sanofi y Vifor Pharma. La nueva afiliación de Susanna Esposito es el Hospital Infantil Pietro Barilla, Servicio de Medicina y Cirugía, Universidad de Parma, Parma, Italia.

**Cumplimiento de las normas éticas.** Este artículo se basa en otros estudios realizados previamente y no contiene datos de ningún estudio

con participantes humanos o animales realizado por ninguno de los autores.

**Disponibilidad de los datos.** El intercambio de datos no es aplicable a este artículo ya que no se generaron ni analizaron conjuntos de datos durante el presente estudio.

**Acceso abierto.** Este artículo se autoriza conforme a lo establecido en la licencia internacional Creative Commons Attribution-Non-Commercial 4.0, que permite el uso, divulgación, adaptación, distribución y reproducción no comercial en cualquier medio o formato, siempre que otorgue el crédito adecuado a los autores del original y a la fuente, proporcione un enlace a la licencia Creative Commons e indique si se han hecho cambios. Las imágenes u otro material de terceros contenidos en este artículo se incluyen en la licencia Creative Commons del artículo, salvo que se indique lo contrario en una línea de crédito al material. Si el material no está incluido en la licencia Creative Commons del artículo y el uso que pretende darle no está permitido por la normativa legal o excede del uso permitido, deberá obtener permiso directamente del titular del copyright. Para ver una copia de esta licencia, visite <http://creativecommons.org/licenses/by-nc/4.0/>.

## REFERENCIAS BIBLIOGRÁFICAS

- Jain N, Lodha R, Kabra SK. Upper respiratory tract infections. *Indian J Pediatr*. 2001;68:1135–8.
- Grief SN. Upper respiratory infections. *Prim Care*. 2013;40(3):757–70. <https://doi.org/10.1016/j.pop.2013.06.004> (Epub 2013 Jul 12).
- Moellering RC Jr. The continuing challenge of lower respiratory tract infections. *Clin Infect Dis*. 2002;34(Suppl 1):S1–3.
- Schaad UB, Esposito S, Razi CH. Diagnosis and management of recurrent respiratory tract infections in children: a practical guide. *Arch Pediatr Infect Dis*. 2016;4(1):e31039.
- Baugh, et al. Clinical practice guideline: tonsillectomy in children. *Otolaryngol Head Neck Surg*. 2011;144(1 Suppl):S1–30. <https://doi.org/10.1177/0194599810389949>.
- Schaad, et al. The management of recurrent respiratory tract infections in children. *Eur Infect Dis*. 2012;6(2):111–5.
- West JV. Acute upper airway infections. *Br Med Bull*. 2002;61:215–30.
- Esposito, et al. Circulation of different rhinovirus groups among children with lower respiratory tract infection in Kiremba, Burundi. *Eur J Clin Microbiol Infect Dis*. 2012;31:3251–6.
- Jiang S, Sun L, Wang B, Yang X, Shang L, Zhang Y. Health-related quality of life among children with recurrent respiratory tract infections in Xi'an China. *PLoS One*. 2013;8(2):e56945. <https://doi.org/10.1371/journal.pone.0056945> (Epub 2013 Feb 25).
- Shehab N, Patel PR, Srinivasan A, Budnitz DS. Emergency department visits for antibiotic-associated adverse events. *Clin Infect Dis*. 2008;47(6):735–43. <https://doi.org/10.1086/591126>.
- Neuzil KM, Hohlbein C, Zhu Y. Illness among schoolchildren during influenza season: effect on school absenteeism, parental absenteeism from work, and secondary illness in families. *JAMA Pediatr*. 2002;156(10):986–91.
- Linder JA, Singer DE. Health-related quality of life of adults with upper respiratory tract infections. *J Gen Intern Med*. 2003;18(10):802–7.
- Dethlefsen L, Huse S, Sogin ML, Relman DA. The pervasive effects of an antibiotic on the human gut microbiota, as revealed by deep 16S rRNA sequencing. *PLoS Biol*. 2008;6(11):e280. <https://doi.org/10.1371/journal.pbio.0060280>.
- Kearney SC, Dziekiewicz M, Feleszko W. Immunoregulatory and immunostimulatory responses of bacterial lysates in respiratory infections and asthma. *Ann Allergy Asthma Immunol*. 2015;114(5):364–9. <https://doi.org/10.1016/j.anai.2015.02.008> (Epub 2015 Mar 6).
- De Benedetto F, Sevieri G. Prevention of respiratory tract infections with bacterial lysate OM-85 bronchomunal in children and adults: a state of the art. *Multidiscip Respir Med*. 2013;8(1):33. <https://doi.org/10.1186/2049-6958-8-33>.
- Esposito S, Soto-Martinez ME, Feleszko W, Jones MH, Shen KL, Schaad UB. Nonspecific immunomodulators for recurrent respiratory tract infections, wheezing and asthma in children: a systematic review of mechanistic and clinical evidence. *Curr Opin Allergy Clin Immunol*. 2018;18(3):198–209. <https://doi.org/10.1097/ACI.0000000000000433>.

17. Gill N, Wlodarska M, Finlay BB. The future of mucosal immunology: studying an integrated system-wide organ. *Nat Immunol.* 2010;11:558–60.
18. Pfefferie PI, Prescott SL, Kopp M. Microbial influence on tolerance and opportunities for intervention with prebiotics/probiotics and bacterial lysates. *J Allergy Clin Immunol.* 2013;132:1453–63.
19. Parola C, Salogni L, Vaira X, et al. Selective activation of human dendritic cells by OM-85 through a NF- $\kappa$ B and MAPK dependent pathway. *PLoS One.* 2013;8(12):e82867. <https://doi.org/10.1371/journal.pone.0082867> (eCollection 2013).
20. Dang AT, Pasquali C, Ludigs K, Guarda G. OM-85 is an immunomodulator of interferon- $\beta$  production and inflammasome activity. *Sci Rep.* 2017;7:43844. <https://doi.org/10.1038/srep43844>.
21. Pasquali C, Salami O, Taneja M, et al. Enhanced mucosal antibody production and protection against respiratory infections following an orally administered bacterial extract. *Front Med (Lausanne).* 2014;1:41. <https://doi.org/10.3389/fmed.2014.00041> (eCollection 2014).
22. Huber M, Mossmann H, Bessler WG. Th1-orientated immunological properties of the bacterial extract OM-85-BV. *Eur J Med Res.* 2005;10(5):209–17.
23. Rossi GA, Bessler W, Ballarini S, Pasquali C. Evidence that a primary anti-viral stimulation of the immune response by OM-85 reduces susceptibility to a secondary respiratory bacterial infection in mice. *Ital J Pediatr.* 2018;44(1):112. <https://doi.org/10.1186/s13052-018-0569-7>.
24. Tao Y, Yuan T, Li X, Yang S, Zhang F, Shi L. Bacterial extract OM-85 BV protects mice against experimental chronic rhinosinusitis. *Int J Clin Exp Pathol.* 2015;8(6):6800–6 (eCollection 2015).
25. Zagar S, Löfler-Badzek D. Broncho-Vaxom in children with rhinosinusitis: a double-blind clinical trial. *ORL J Otorhinolaryngol Relat Spec.* 1988;50(6):397–404.
26. Campbell H. Acute respiratory infection: a global challenge. *Arch Dis Child.* 1995;73(4):281–3.
27. Seemungal TA, Donaldson GC, Paul EA, Bestall JC, Jeffries DJ, Wedzicha JA. Effect of exacerbation on quality of life in patients with chronic obstructive pulmonary disease. *Am J Respir Crit Care Med.* 1998;157(5 Pt1):1418–22.
28. Arcavi L, Benowitz NL. Cigarette smoking and infection. *Arch Intern Med.* 2004;164(20):2206–16.
29. Paupe J. Immunotherapy with an oral bacterial extract (OM-85 BV) for upper respiratory infections. *Respiration.* 1991;58:150–4.
30. Del-Río-Navarro BE, Sienra-Monge JLL, Berber A, Torres-Alcántara S, Avila-Castañón L, Gómez-Barreto D. Use of OM-85 BV in children suffering from recurrent respiratory tract infections and subnormal IgG subclass levels. *Allergol Immunopathol (Madr).* 2003;31:7–13.
31. Jara-Perez JV, Berber A. Primary prevention of acute respiratory tract infections in children using a bacterial immunostimulant: a double-masked, placebo-controlled clinical trial. *Clin Ther.* 2000;22:748–59.
32. Gutiérrez-Tarango MD, Berber A. Safety and efficacy of two courses of OM-85 BV in the prevention of respiratory tract infections in children during 12 months. *Chest.* 2001;119:1742–8.
33. Schaad UB. OM-85 BV, an immunostimulant in pediatric recurrent respiratory tract infections: a systematic review. *World J Pediatr.* 2010;6:5–12.
34. Del-Rio-Navarro BE, Espinosa-Rosales FJ, Flenady V, Sienra-Monge JLL Cochrane review: immunostimulants for preventing respiratory tract infection in children. *Evid-Bas Child Health (Cochrane Review).* 2012. <https://doi.org/10.1002/ebch.1833>.
35. Esposito S, Marchisio P, Prada E, et al. Impact of a mixed bacterial lysate (OM-85 BV) on the immunogenicity, safety and tolerability of inactivated influenza vaccine in children with recurrent respiratory tract infection. *Vaccines.* 2014;32:2546–52. <https://doi.org/10.1016/j.vaccine.2014.03.055> (Epub 2014 Mar 26).
36. Razi CH, Harmancı K, Abacı A, et al. The immunostimulant OM-85 BV prevents wheezing attacks in preschool children. *J Allergy Clin Immunol.* 2010;126(4):763–9. <https://doi.org/10.1016/j.jaci.2010.07.038>.
37. Yin J, Xu B, Zeng X, Shen K. Broncho-Vaxom in pediatric recurrent respiratory tract infections: a systematic review and meta-analysis. *Int Immunopharmacol.* 2018;54:198–209.
38. Esposito S, Bianchini S, Polinori I, Principi N. Impact of OM-85 given during two consecutive years to children with a history of recurrent respiratory tract infections: a retrospective study. *Int J Environ Res Public Health.* 2019;16(6):E1065. <https://doi.org/10.3390/ijerph16061065>.
39. Esposito S, Bianchini S, Bosis S, et al. A randomized, placebo-controlled, double-blinded, single-centre, phase IV trial to assess the efficacy and safety of OM-85 in children suffering from recurrent respiratory tract infections. *J Transl Med.* 2019;17:284. <https://doi.org/10.1186/s12967-019-2040-y>.
40. Rosenfeld RM, Shin JJ, Schwartz SR, et al. Clinical practice guideline: otitis media with effusion

- (update). *Otolaryngol Head Neck Surg.* 2016;154(1 Suppl):S1–41. <https://doi.org/10.1177/0194599815623467>.
41. Lusk R. Pediatric chronic rhinosinusitis. *Curr Opin Otolaryngol Head Neck Surg.* 2006;14(6):393–6.
  42. Marengo, Juchli, Arduoso, Riolfi 1er Congreso mundial de ORL pediátrica Argentina.
  43. Gómez Barreto D, De la Torre C, Alvarez A, Faure A, Berber A. [Safety and efficacy of OM-85-BV plus amoxicillin/clavulanate in the treatment of subacute sinusitis and the prevention of recurrent infections in children]. [Article in Spanish]. *Allergol Immunopathol (Madr.)* 1998;26(1):17–22.
  44. Bitar MA, Saade R. The role of OM-85 BV (Broncho-Vaxom) in preventing recurrent acute tonsillitis in children. *Int J Pediatr Otorhinolaryngol.* 2013;77:670–3.
  45. Karaca NE, Gulez N, Aksu G, Azarsiz E, Kutukculer N. Does OM-85 BV prophylaxis trigger autoimmunity in IgA deficient children? *Int Immunopharmacol.* 2011;11:1747–51.
  46. Del-Rio-Navarro BE, Espinosa Rosales F, Flenady V, Sienra-Monge JJ. Immunostimulants for preventing respiratory tract infection in children. *Cochrane Database Syst Rev.* 2006;4:CD004974.
  47. Esposito S, Musio A. Immunostimulants and prevention of recurrent respiratory tract infections. *J Biol Regul Homeost Agents.* 2013;27(3):627–36.
  48. Fokkens, et al. EPOS 2012: European position paper on rhinosinusitis and nasal polyps 2012. A summary for otorhinolaryngologists. *Rhinology.* 2012;50(1):1–12.
  49. Dibildox-Martinez J, Mayorga Butron JL, Macias Fernandez LA, et al. Pan-American clinical guideline on rhinosinusitis. *Otolaryngol Head Neck Surg.* 2012;147(suppl 2):253. <https://doi.org/10.1177/0194599812451426a408>.
  50. Anselmo-Lima WT, Sakano E, Tamashiro E, et al. Rhinosinusitis: evidence and experience: October 18 and 19, 2013, São Paulo. *Braz J Otorhinolaryngol.* 2015;81(1 Suppl 1):S1–49. <https://doi.org/10.1016/j.bjorl.2015.01.003> (Erratum. In: *Braz J Otorhinolaryngol.* 2015;81(4):454).
  51. Feleszko W, Marengo R, Vieira AS, Ratajczak K, Mayorga Butrón JL. Immunity-targeted approaches to the management of chronic and recurrent upper respiratory tract disorders in children. *Clin Otolaryngol.* 2019. <https://doi.org/10.1111/coa.13335> (Epub ahead of print).
